# Supplementary material
Source: Springer Nature journal article supplement (https://www.springermedizin.de/resource/supplementary/13058_2013_3369_MOESM4_ESM.pdf/9703970)

## Figure S4

### **Mammary glands from control animals (both induced and un-induced) are normal**

(A) Representative H&E-stained whole mount preparations of inguinal mammary glands from control animals of the indicated genotypes induced for 9 to 11 weeks or left un-induced. (Scale bars: 0.5mm left; 5mm, right).

(B) Representative H&E-staining of mammary gland sections from induced and un-induced control animals of the same genotypes as indicated in (A). (Scale bars: 500 $\mu$ m, left column; 100 $\mu$ m, right column).

**A**

rtTA (-Dox)

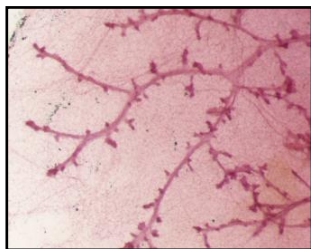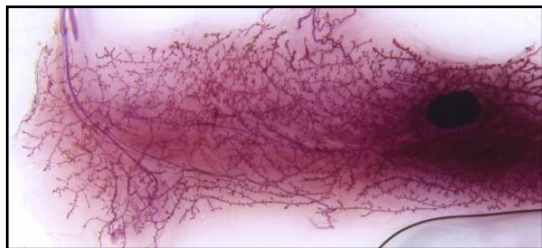

rtTA (+Dox)

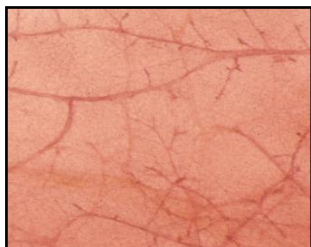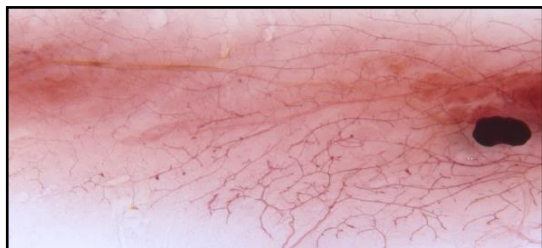

MIC (-Dox)

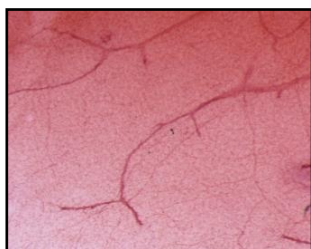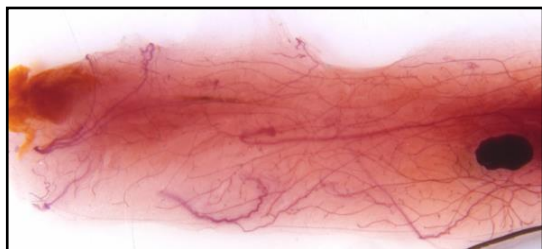

MIC (+Dox)

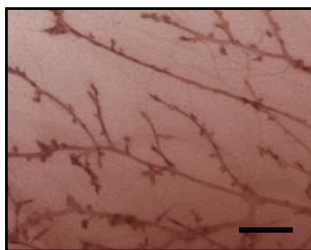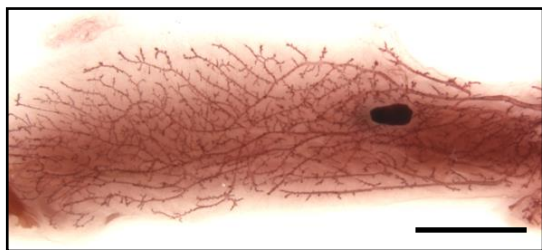**B**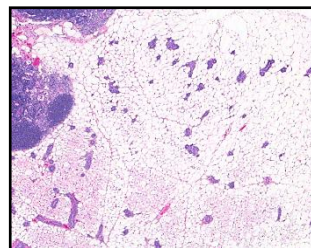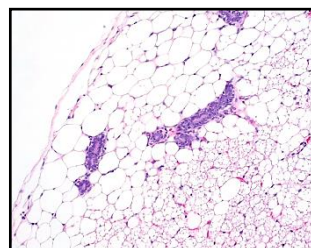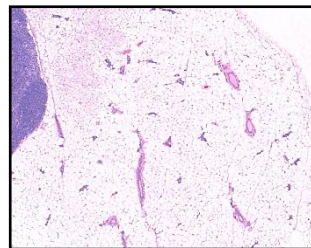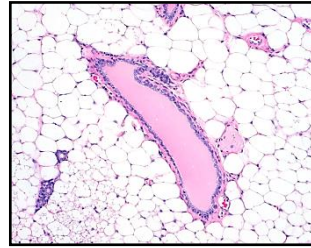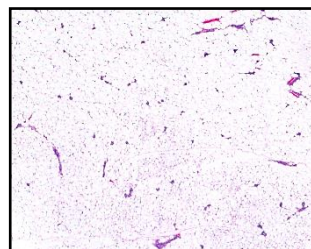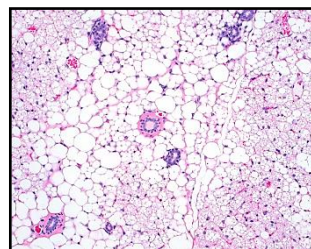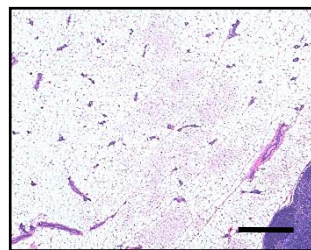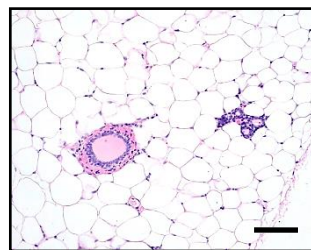

Supplement: MOESM4 [file 9703970]
